# Supplementary material for: In situ monitoring of single molecule binding reactions with time-lapse atomic force microscopy on functionalized DNA origami
Source: Royal Society of Chemistry journal article supplement (doi:10.1039/c1nr10181a), 2011-01-01
Supplement: c1nr10181a.pdf [file c1nr10181a.pdf]

## Supporting information

### In situ monitoring of single molecule binding reactions with time-lapse atomic force microscopy on functionalized DNA origami

Na Wu, Xingfei Zhou, Daniel M. Czajkowsky, Ming Ye, Dongdong Zeng, Yanming Fu, Chunhai Fan, Jun Hu, and Bin Li

Thrombin control result:

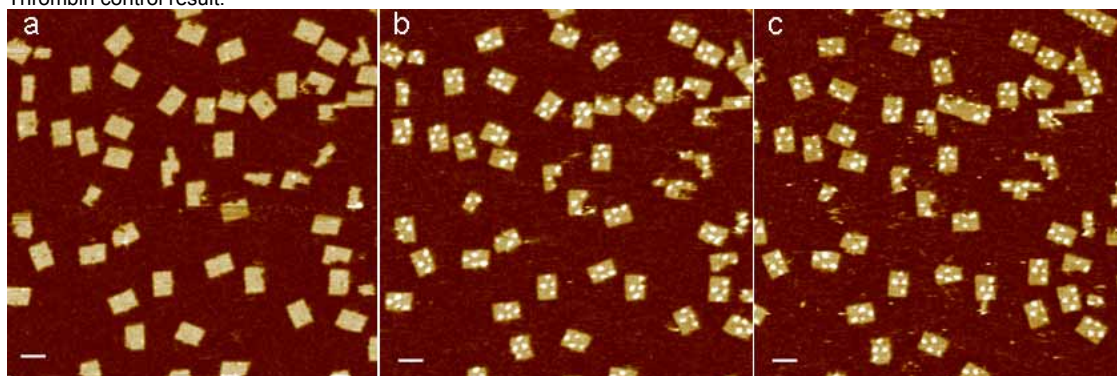

Fig. S1: AFM images of DNA origami before and after exposure to 200 nM thrombin for 30 min. (a) Biotinylated DNA origami. (b) After adding SA (76 nM) for 5 min. (c) After exposure to thrombin 200 nM for 30 min. The scale bar 200 nm.
